# Supplementary material for: Downregulation of lncRNA MIR181A2HG by high glucose impairs vascular endothelial cell proliferation and migration through the dysregulation of the miRNAs/AKT2 axis
Source: PubMed Central journal article supplement — Int J Mol Med. 2021 Feb 2;47(4):35. doi: 10.3892/ijmm.2021.4868 (PMC7891834; doi:10.3892/ijmm.2021.4868), 2021-02-02
Supplement: IJMM-47-04-04868-Supplementary_Data1.pdf [file IJMM-47-04-04868-Supplementary_Data1.pdf]

Figure S1. Transfection efficiency of miRNAs and the different constructs. (A) RT-qPCR was used to detect the relative expression of miR-6752-5p, miR-6832-5p, miR-6842-5p, miR-7110-5p and miR-8056 in HUVECs transfected with these miRNAs or their control. \*P<0.05 and \*\*P<0.01 vs. negative miR-Ctl. (B) RT-qPCR detected the relative expression of miR-181-3p and miR-181-5p in HUVECs transfected with miR-181-3p, miR-181-5p or their control. \*P<0.05 and \*\*P<0.01 vs. negative miR-Ctl. (C) RT-qPCR was performed in HUVECs to confirm the successful knockdown and overexpression of MIR181A2HG. \*P<0.05 and \*\*P<0.01 vs. the corresponding control. (D) RT-qPCR was performed to detect the expression of AKT2 in HUVECs transfected with pGFP-N1/AKT2 or shR-AKT2. \*P<0.05 and \*\*P<0.01 vs. the corresponding control.

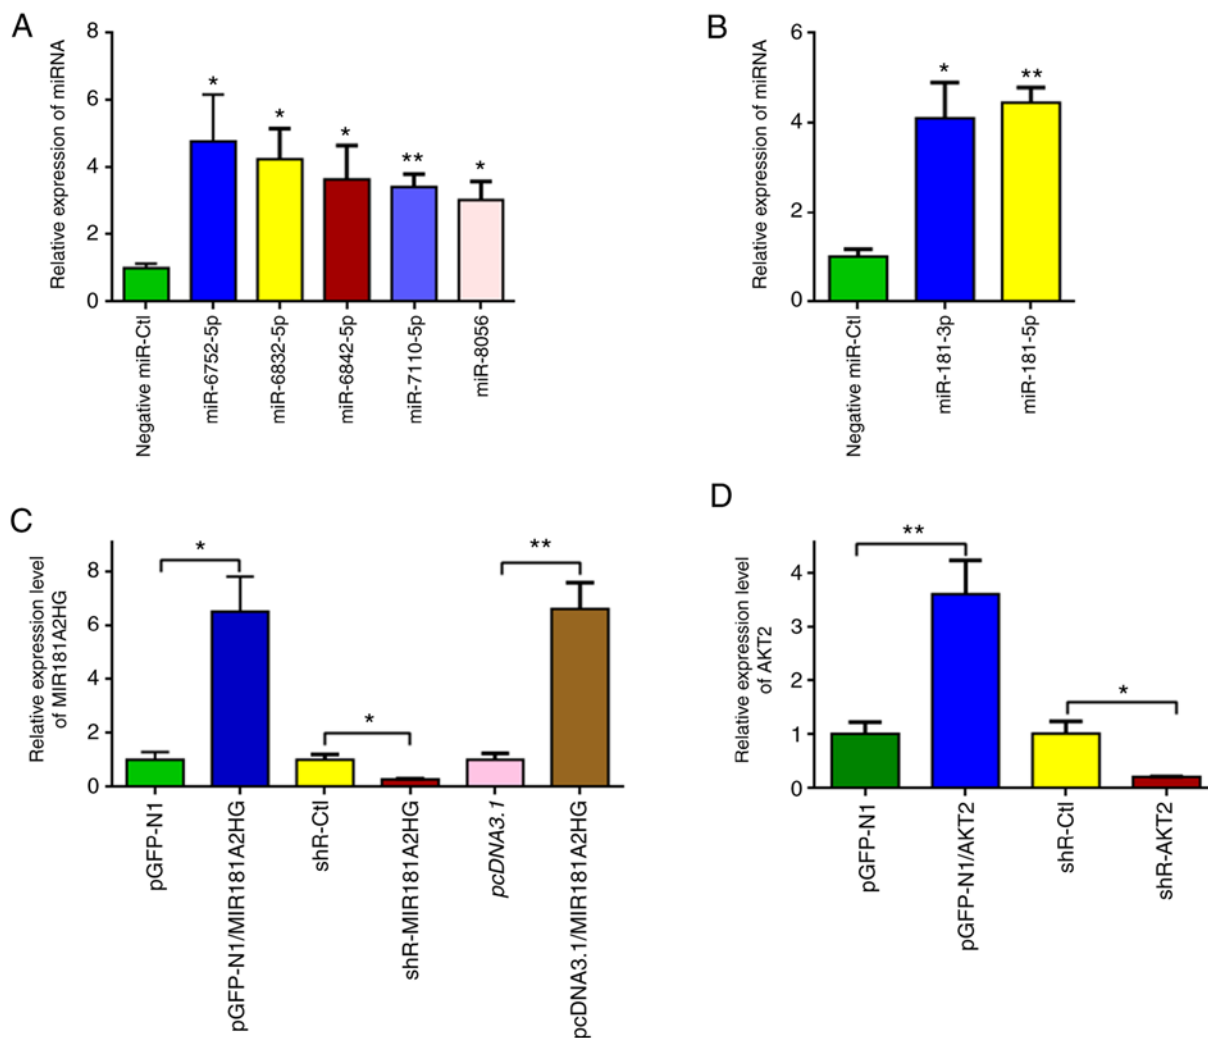

Table SI. Sequences of MIR181A2HG and mutated MIR181A2HG used in luciferase reporter assay.

|                                |                                                                                                                                                                                                                                                                                                                                                                                                                                                                                                                                                                                                                                                                                                                             |
|--------------------------------|-----------------------------------------------------------------------------------------------------------------------------------------------------------------------------------------------------------------------------------------------------------------------------------------------------------------------------------------------------------------------------------------------------------------------------------------------------------------------------------------------------------------------------------------------------------------------------------------------------------------------------------------------------------------------------------------------------------------------------|
| lncRNA MIR181A2HG sequence     | GGGCTGCAAGGAAATCTGGCGCGGTTCAATACCTCGTCTAGCCTGGGTTTC<br>CAGTATCTAATTTTTTTTTTTGTTTTAACTGACAACTCATTTCTCTACTGGGA<br>CAGGATGCTGTGCTGGCTGGAAGTTCATTTCTACAGCAAGAATCCTATCT<br>GGAAACACAGAAGTTGTCCTCTAGCCACAGCAGCTCGAACTTTTTTGATT<br>GTCGTTGCTGCTTTCTCCCATCACCCCATCCCCTTTTGACAAAGATCCAA<br>CTGTAAAAGTCTTACGTAACAGTTCAGGACTACTTCGGTTCCTTTACTGG<br>ATGCAGAATCTACCTACATTCGGCTGAAAATCAGATGGAAGAATCCACAGA<br>GGAAAGGAAGGAAAGGCGAACTGTCCTGTGGAAAGCACAGCTGCAGGGA<br>TAGTAGAAAGTAACAGGCTCTCGATCCGTGGGAGGTGGTCACTTTGGAGG<br>ACAGATAAGTCATCCTCAGAGAACGAACACAATGAAGGAAATTCCAGCCT<br>ATTCATGTTCTCCTCTCAGGCTGTACCTCAACAAGATCCAACCTGGACTTTG<br>TGATCTCATAACCTGTCAAGGGGCCTGGCATGGAGTAGATAATAAATGTTT<br>TTTTTAATC                                    |
| lncRNA MIR181A2HG mut sequence | GGGCTGCAAGGAAATCTGGCGCGGTTCAATACCTCGTCTAGCCTGGGTTTC<br>CAGTATCTAATTTTTTTTTTTGTTTTAACTGACAA <b>ATGAT</b> ATTT <b>GAGATGT</b> GGG<br>ACAGGATGCTGTGCTGGCTGGAAGTTCATTTCTACAGCAAGAATCCTATC<br>TGAAACACAGAAGTTGTCCTCTAGCCACAGCAGCTCGAACTTTTTTGAT<br>TGTCGTTGCTGCA <b>AGAGCCATCTGGGGG</b> ATCCCCTTTTGACAAAGATCC<br>AACTGTAAAAGTCTTACGTAACAGTTCAGGACTACTTCGGTTCCTTTACT<br>GGATGCAGAATCTACCTACATTCGGCTGAAAAT <b>CTCTAGGAAGATAGGTGA</b><br>GAGGAAAGGAAGGAAAGGCGAACTGTCCTGTGGAAAGCACAGCTGCAGG<br>GATAGTAGAAAGTAACAGGCTCTCGATCCGTGGGAGGTGGTCACTTTGGA<br>GGACAGATAAGTCATCCTCAGAGAACGAACACAATGAAGGAAATTCCAGC<br>CTATTCATGTTCTCCTCTCAGGCTGTACCTCAACAAGATCCAACCTGGACTT<br>TGTGATCTCATAACCTGTCAAGGGGCCTGGCATGGAGTAGATAATAAATGT<br>TTTTTTAATC |

Sequences in italics indicate the wild-type of lncRNA MIR181A2HG binding to miRNAs (miR-6832-5p, miR-6842-5p and miR-8056). Sequences in bold italics indicate the mutatoin of lncRNA MIR181A2HG binding to miRNAs (miR-6832-5p, miR-6842-5p and miR-8056).
